# Supplementary material for: Visible-light driven H2 evolution coupled with furfuryl alcohol selective oxidation over Ru atom decorated Zn0.5Cd0.5S nanorods
Source: Royal Society of Chemistry journal article supplement (doi:10.1039/d2cy01945k), 2023-01-01
Supplement: d2cy01945k1.pdf [file d2cy01945k1.pdf]

## Supporting Information

Visible-light driven H<sub>2</sub> evolution coupled with furfuryl alcohol selective  
oxidation over Ru atom decorated Zn<sub>0.5</sub>Cd<sub>0.5</sub>S nanorods

Fan Yang, Shengqiang Liu, Ting Tang, Shuang Yao, and Changhua An\*

*Tianjin Key Laboratory of Organic Solar Cells and Photochemical Conversion,  
School of Chemistry and Chemical Engineering, Tianjin University of Technology,  
Tianjin 300384, P. R. China*

**\* Corresponding Author**

E-mail: anchua@ustc.edu.

## Figures

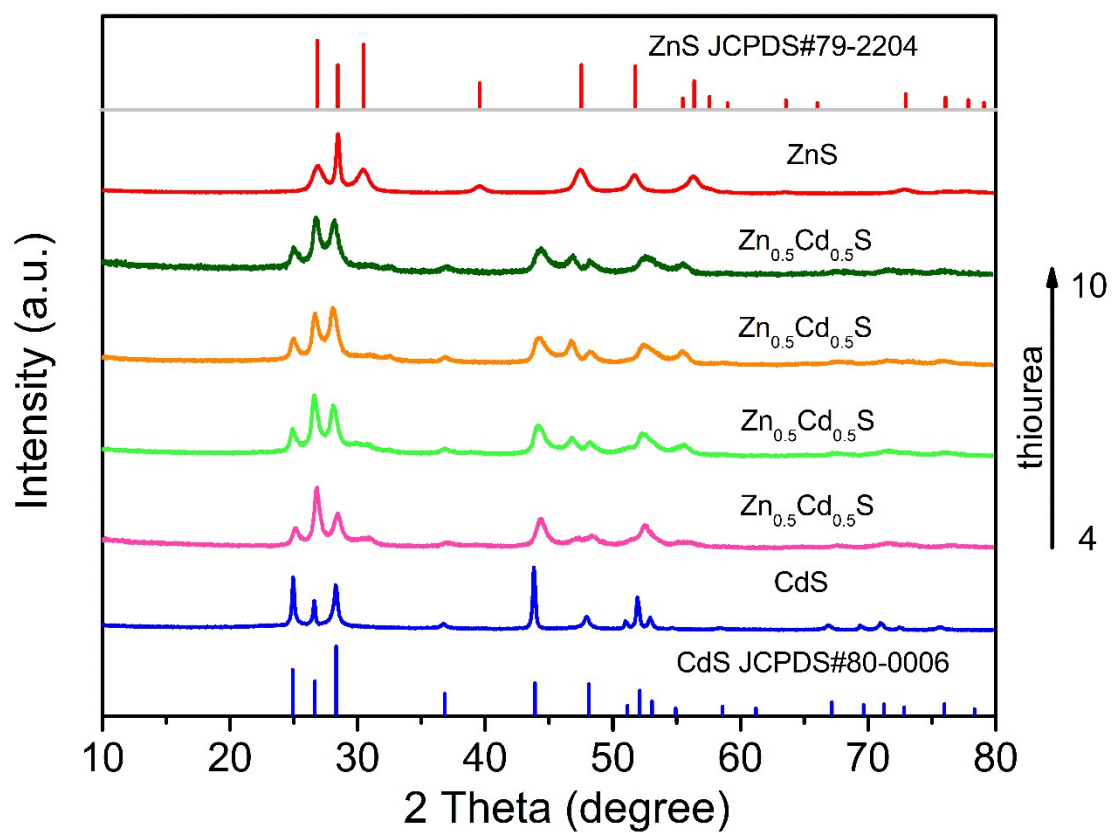

**Fig. S1.** XRD patterns of ZnS, CdS, and Zn<sub>0.5</sub>Cd<sub>0.5</sub>S synthesized using different dosages of thiourea.

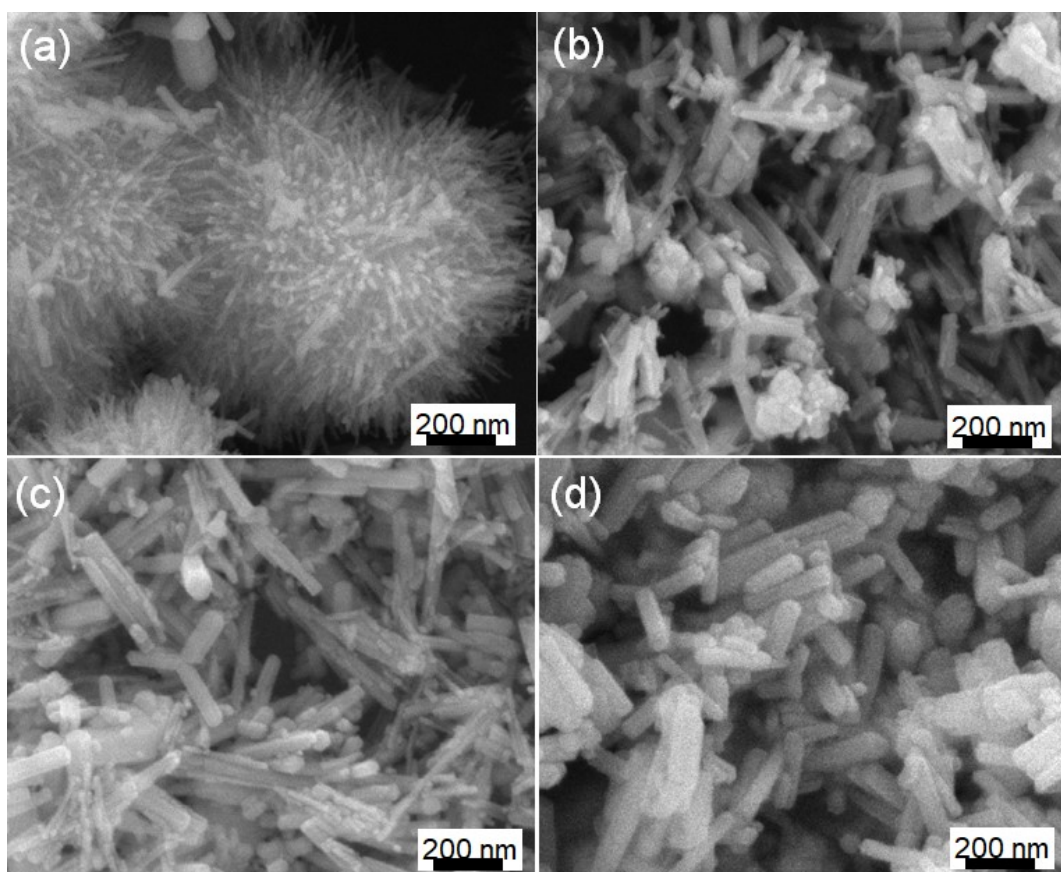

**Fig. S2.** (a-d) SEM images of Zn<sub>0.5</sub>Cd<sub>0.5</sub>S synthesized using 4 (a), 6 (b), 8 (c), and 10 (d) mmol thiourea.

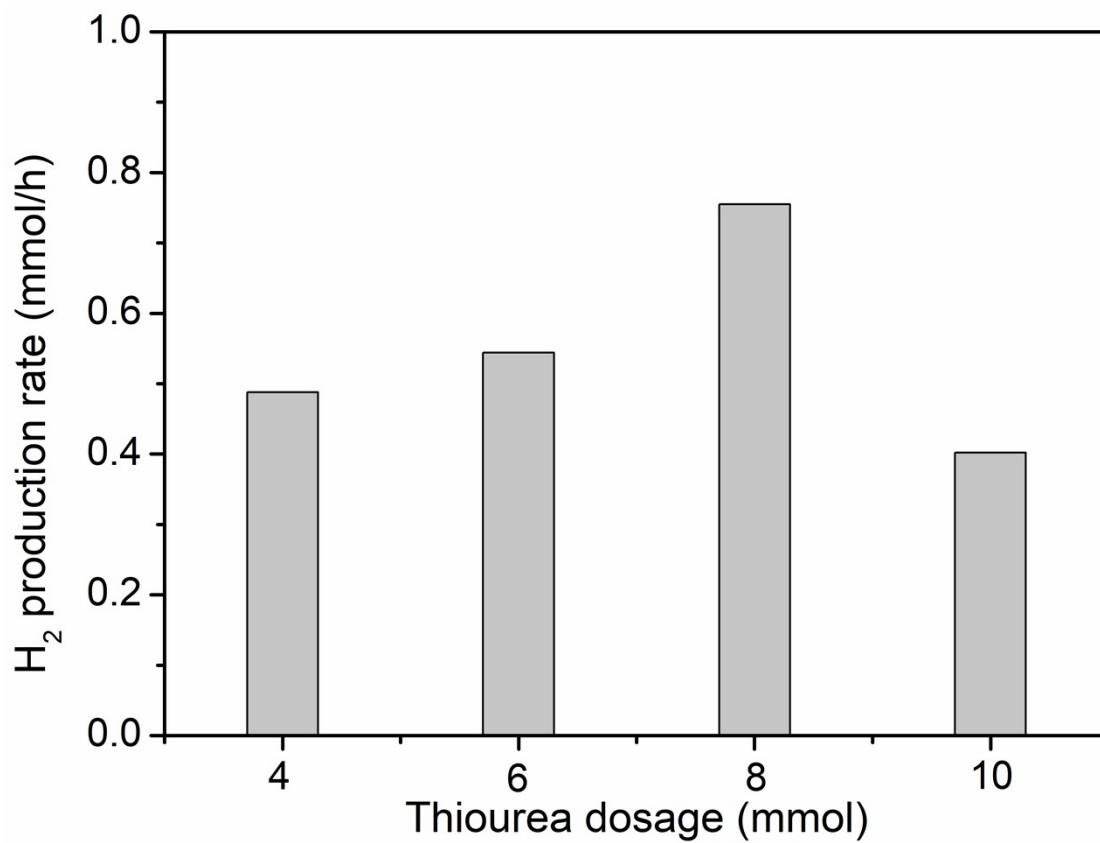

**Fig. S3.** Photocatalytic H<sub>2</sub> evolution performance of Zn<sub>0.5</sub>Cd<sub>0.5</sub>S synthesized using 4, 6, 8, and 10 mmol thiourea. Light source: 300 W Xeon lamp equipped with a UV cutoff filter; reaction solution: 60 mL of Na<sub>2</sub>S/Na<sub>2</sub>SO<sub>3</sub> solution (0.25 M/0.35 M), 20 mg catalyst.

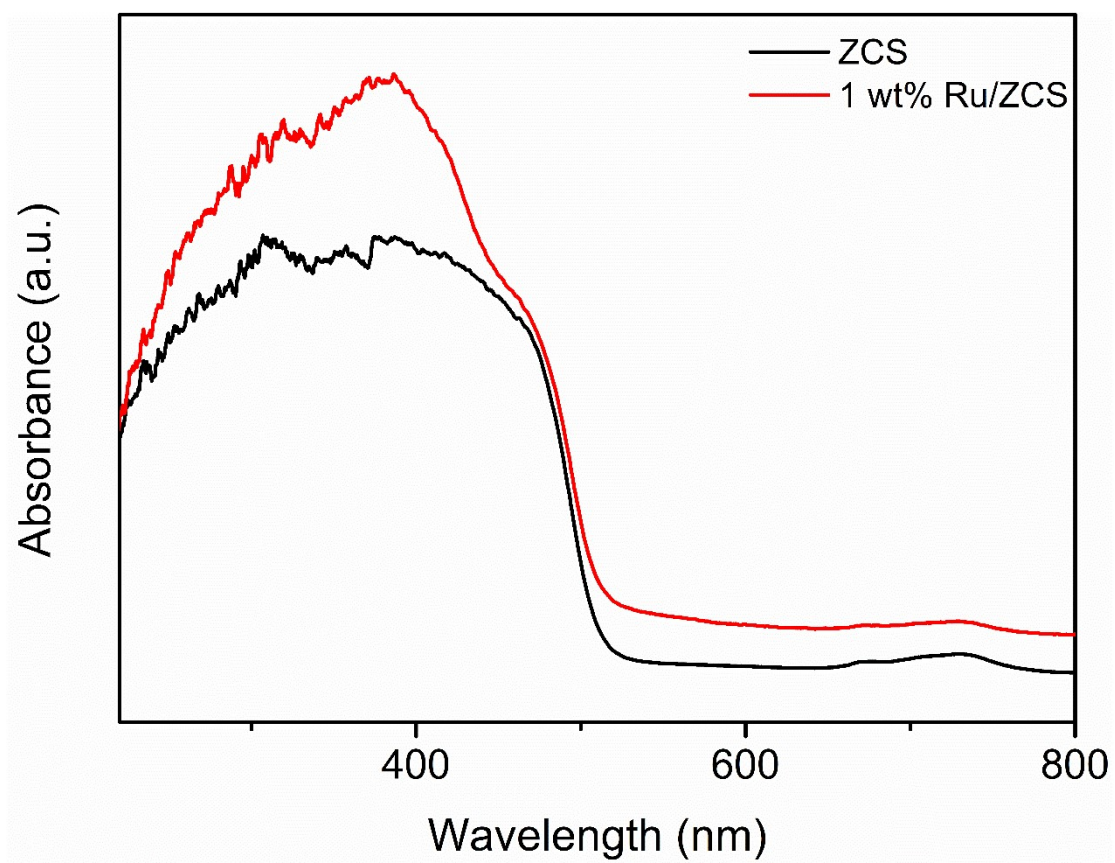

**Fig. S4.** UV-vis absorption spectra of ZCS and 1 wt% Ru/ZCS.

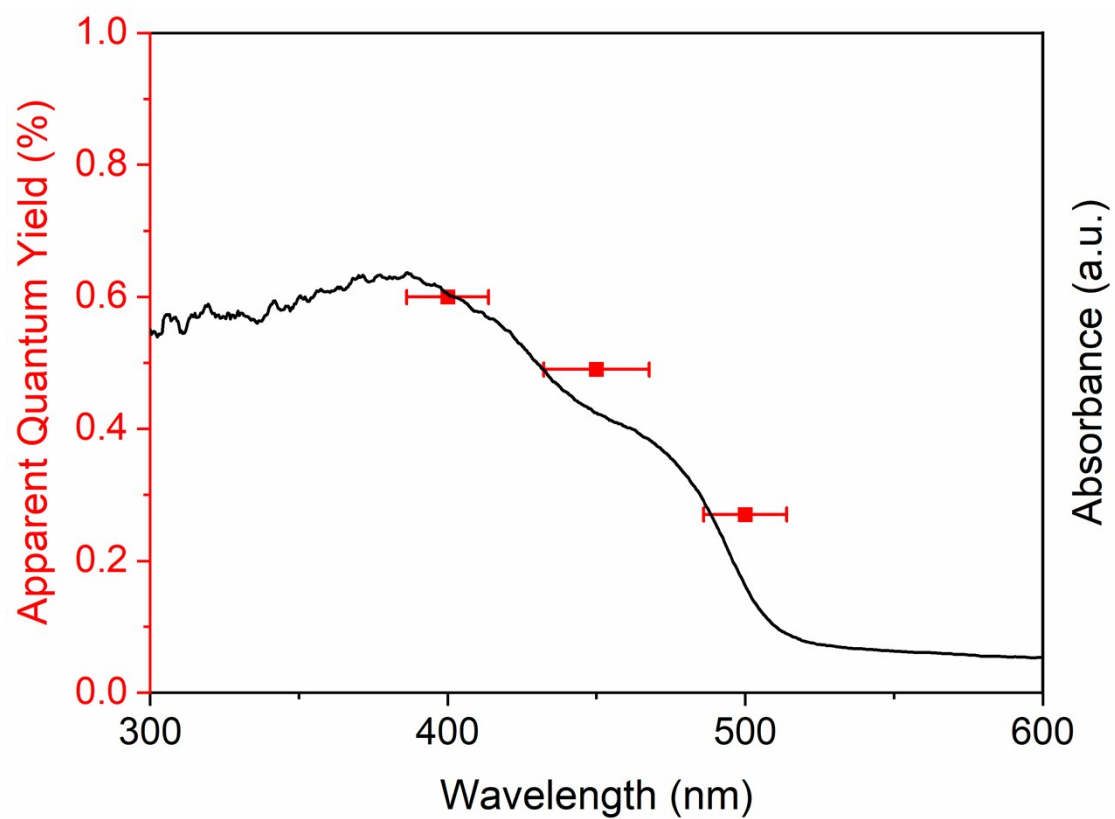

**Fig. S5.** Wavelength dependent AQY of photocatalytic H<sub>2</sub> production over 1 wt% Ru/ZCS.

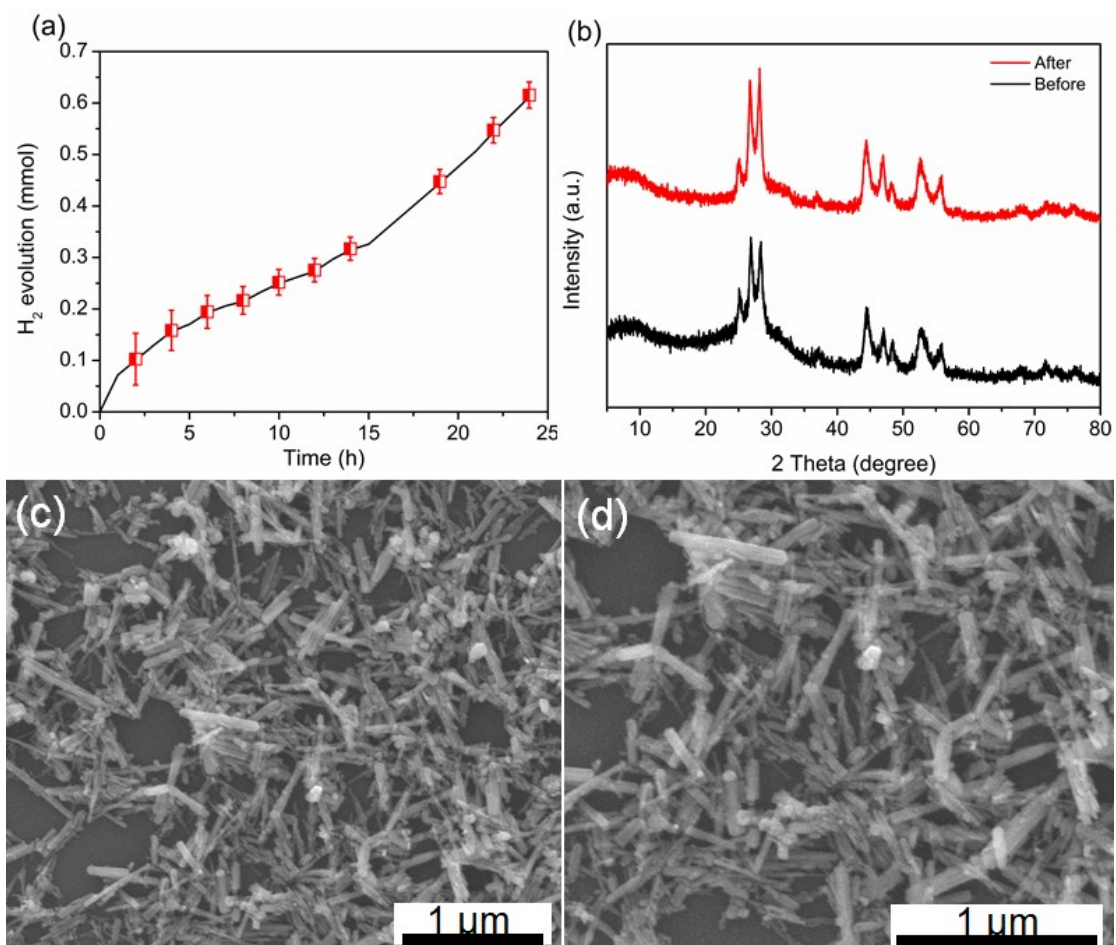

**Fig. S6.** (a) Time course of H<sub>2</sub> evolution over 24 h irradiation, (b) XRD pattern, (c, d) SEM images of 1 wt% Ru/Zn<sub>0.5</sub>Cd<sub>0.5</sub>S after the photocatalytic reaction.

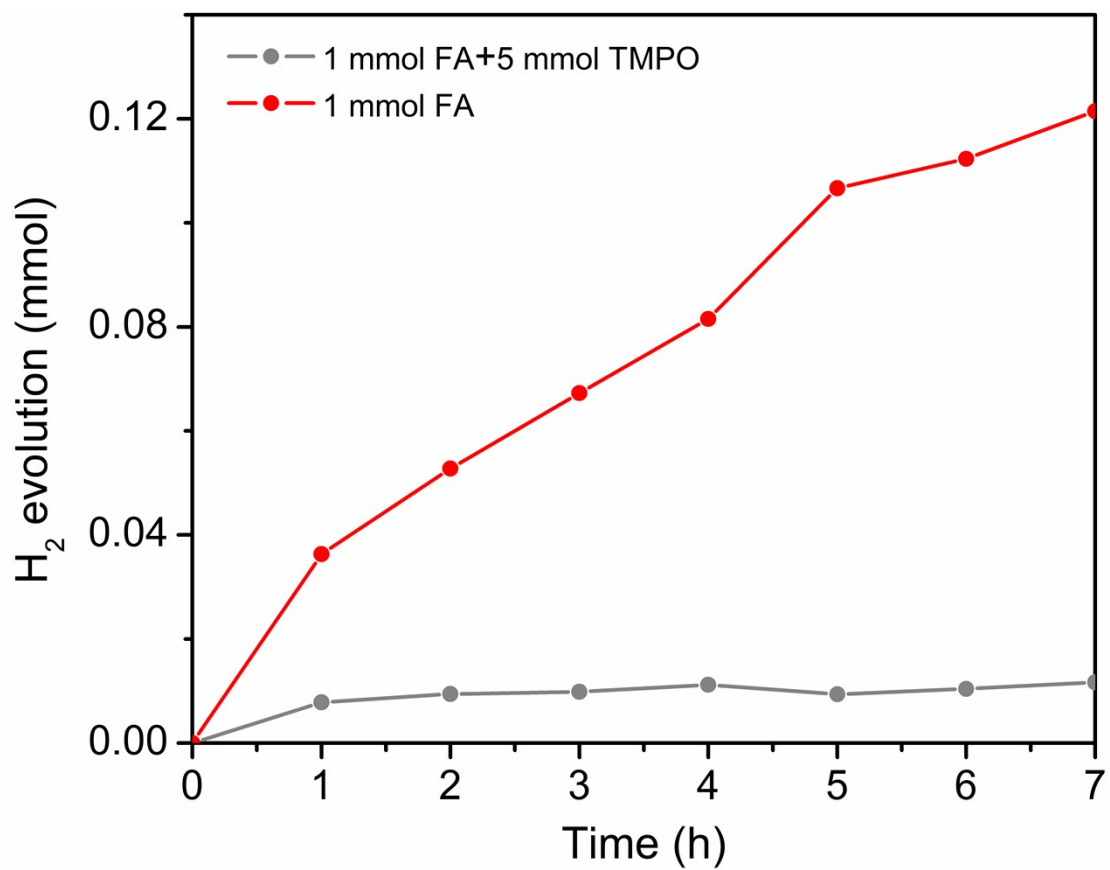

**Fig. S7.** Time course of photocatalytic H<sub>2</sub> evolution over 1 wt% Ru/Zn<sub>0.5</sub>Cd<sub>0.5</sub>S in the presence of furfuryl alcohol and TMPO.



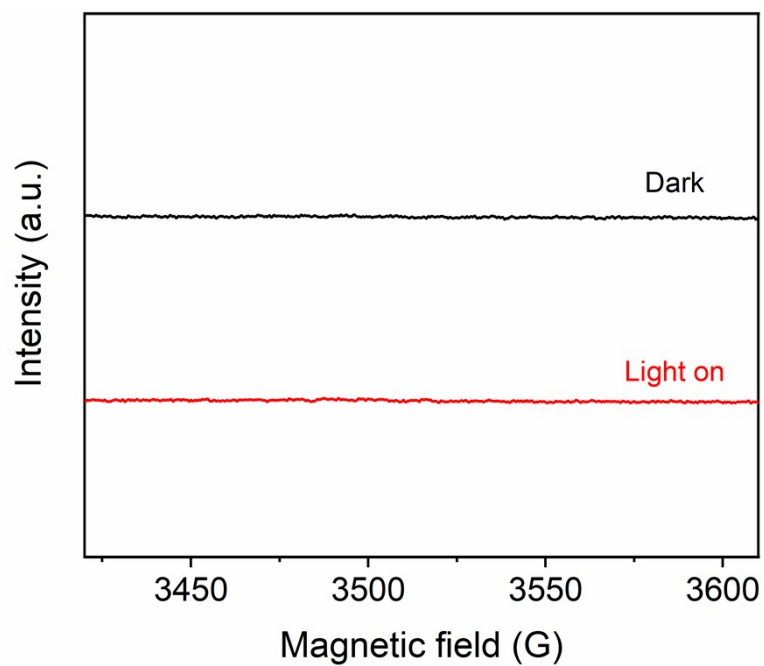

**Fig. S8.** EPR spectra of 1 wt% Ru/Zn<sub>0.5</sub>Cd<sub>0.5</sub>S using DMPO as the spin-trapping agent.

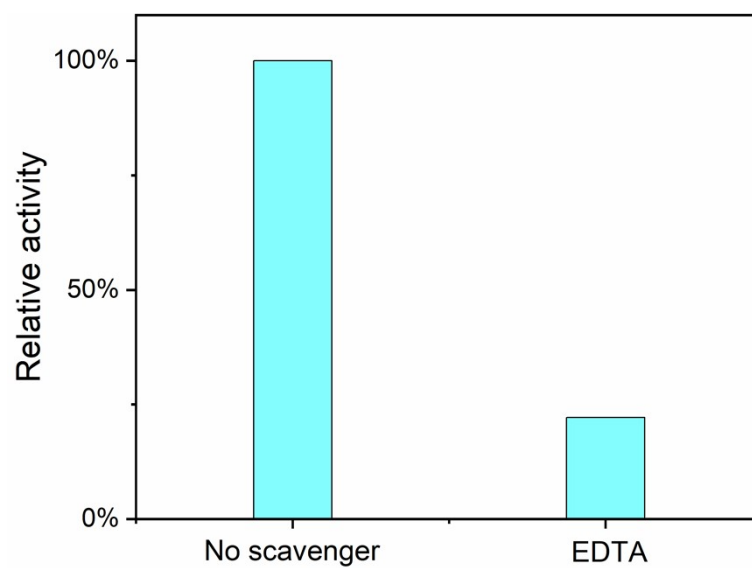

**Fig. S9.** Relative performance of the oxidation of furfuryl alcohol to furfural over 1 wt% Ru/Zn<sub>0.5</sub>Cd<sub>0.5</sub>S with and without EDTA as a hole scavenger.

**Table S1** Comparison of photocatalytic activity of H<sub>2</sub> production coupled with alcohol oxidation from literatures.

| Photocatalyst                                      | Reactant weight | Alcohol                 | Light source    | Activity ( $\mu\text{mol h}^{-1}$ ) | Oxidation product and selectivity | Ref.      |
|----------------------------------------------------|-----------------|-------------------------|-----------------|-------------------------------------|-----------------------------------|-----------|
| Ti <sub>3</sub> C <sub>2</sub> T <sub>x</sub> /CdS | 10 mg           | Furfuryl alcohol        | 300 W Xe lamp   | 1.9                                 | Furfural<br>93%                   | [S1]      |
| Ti <sub>3</sub> C <sub>2</sub> T <sub>x</sub> /CdS | 10 mg           | Furfuryl alcohol        | 3 W blue LED    | 6.1                                 | Furfural<br>N/A                   | [S2]      |
| MoS <sub>2</sub> /ZnIn <sub>2</sub> S <sub>4</sub> | 5 mg            | Furfuryl alcohol        | 300 W Xe lamp   | 14.7                                | Furfural<br>N/A                   | [S3]      |
| NiS/ZnIn <sub>2</sub> S <sub>4</sub>               | 5 mg            | Furfuryl alcohol        | 300 W Xe lamp   | 12.5                                | Furfural<br>N/A                   | [S3]      |
| WS <sub>2</sub> /ZnIn <sub>2</sub> S <sub>4</sub>  | 5 mg            | Furfuryl alcohol        | 300 W Xe lamp   | 13.0                                | Furfural<br>N/A                   | [S3]      |
| Ni/CdS                                             | 10 mg           | Furfuryl alcohol        | 450 nm LED lamp | 20.3                                | Furfural<br>>99%                  | [S4]      |
| Zn <sub>0.5</sub> Cd <sub>0.5</sub> S-P            | 1 mg            | 5-hydroxymethylfurfural | White LED light | 0.8                                 | 2,5-diformylfuran<br>65%          | [S5]      |
| Co <sub>9</sub> S <sub>8</sub> /CdS                | 1 mg            | Benzyl-alcohol          | 450 nm LED Lamp | 4.3                                 | Benzaldehyde<br>>99%              | [S6]      |
| Co <sub>9</sub> S <sub>8</sub> /CdS                | 1 mg            | Benzyl-alcohol          | 300 W Xe lamp   | 10.3                                | Benzaldehyde<br>>99%              | [S6]      |
| CdS/MIL-53(Fe)                                     | 5 mg            | Benzyl-alcohol          | 300 W Xe lamp   | 11.67                               | Benzaldehyde<br>99%               | [S7]      |
| Pt/g-C <sub>3</sub> N <sub>4</sub>                 | 10 mg           | Benzyl-alcohol          | 300 W Xe lamp   | 2.55                                | Benzaldehyde<br>90%               | [S8]      |
| Ru/Zn <sub>0.5</sub> Cd <sub>0.5</sub> S           | 20 mg           | Furfuryl alcohol        | 300 W Xe lamp   | 17.4                                | Furfural<br>>99%                  | this work |

**Table S2.** Kinetic analysis of emission decay of ZCS, 1 wt% Au/ZCS, 1 wt% Pt/ZCS, 1 wt% Pd/ZCS, and 1 wt% Ru/ZCS.

| Samples      | Decay life time (ns) |          |          | Fractional contribution |       |       | Average lifetime |
|--------------|----------------------|----------|----------|-------------------------|-------|-------|------------------|
|              | $\tau_1$             | $\tau_2$ | $\tau_3$ | $f_1$                   | $f_2$ | $f_3$ | (ns)             |
| ZCS          | 0.416                | 2.0      | 18.0     | 2.0                     | 9.7   | 88.3  | 4.50             |
| 1 wt% Au/ZCS | 0.414                | 1.90     | 12.0     | 2.8                     | 13.2  | 84.0  | 2.20             |
| 1 wt% Pt/ZCS | 0.334                | 1.20     | 6.60     | 4.2                     | 14.7  | 81.1  | 1.90             |
| 1 wt% Pd/ZCS | 0.388                | 1.50     | 6.70     | 4.5                     | 17.5  | 78.0  | 1.59             |
| 1 wt% Ru/ZCS | 0.322                | 0.83     | 4.50     | 5.7                     | 14.7  | 79.6  | 1.35             |

## Supplementary References

[S1] Y.-H. Li, F. Zhang, Y. Chen, J.-Y. Li, Y.-J. Xu, Photoredox-catalyzed biomass intermediate conversion integrated with H<sub>2</sub> production over Ti<sub>3</sub>C<sub>2</sub>T<sub>x</sub>/CdS composites, *Green Chem.*, 2020, 22: 163-169.

[S2] J. Wang, X. Liu, Z. Li, Acceptorless photocatalytic dehydrogenation of furfuryl alcohol (FOL) to furfural (FAL) and furoic acid (FA) over Ti<sub>3</sub>C<sub>2</sub>T<sub>x</sub>/CdS under visible light, *Chem. Asian J.* 2021.

[S3] C.-L. Tan, M.-Y. Qi, Z.-R. Tang, Y.-J. Xu, Cocatalyst decorated ZnIn<sub>2</sub>S<sub>4</sub> composites for cooperative alcohol conversion and H<sub>2</sub> evolution, *Appl. Catal., B*, 2021, 298: 120541.

[S4] G. Han, Y.-H. Jin, R. A. Burgess, N. E. Dickenson, X.-M. Cao, Y. Sun, Visible-light-driven valorization of biomass intermediates integrated with H<sub>2</sub> production catalyzed by ultrathin Ni/CdS nanosheets, *J. Am. Chem. Soc.*, 2017, 139: 15584-15587.

[S5] H.-F. Ye, R. Shi, X. Yang, W.-F. Fu, Y. Chen, P-doped Zn<sub>x</sub>Cd<sub>1-x</sub>S solid solutions as photocatalysts for hydrogen evolution from water splitting coupled with photocatalytic oxidation of 5-hydroxymethylfurfural, *Appl. Catal., B*, 2018, 233: 70-79.

[S6] M. Liu, L.-Z. Qiao, B.-B. Dong, S. Guo, S. Yao, C. Li, Z.-M. Zhang, T.-B. Lu, Photocatalytic coproduction of H<sub>2</sub> and industrial chemical over MOF-derived direct Z-scheme heterostructure, *Appl. Catal., B*, 2020, 273: 119066.

[S7] P. Li, X. Yan, S. Gao, R. Cao, Boosting photocatalytic hydrogen production

coupled with benzyl alcohol oxidation over CdS/metal–organic framework composites, *Chem. Eng. J.*, 2021, 421: 129870.

[S8] F. Li, Y. Wang, J. Du, Y. Zhu, C. Xu, L. Sun, Simultaneous oxidation of alcohols and hydrogen evolution in a hybrid system under visible light irradiation, *Appl. Catal., B*, 2018, 225: 258-263.
